# Supplementary material
Source: publisher figshare collection journal article supplement (https://frontiersin.figshare.com/ndownloader/files/29052132)
Supplement: Supplementary file 1 [file 29052132]

Supplementary 1 Deployment locations and dates for the VR2W 69 kHz acoustic receivers near oil and gas infrastructure on the North West Shelf of Australia. # denotes approximate deployment positions during ROV pipeline surveys, full ROV tracks are undisclosed

| <b>Station Name</b>     | <b>Receiver serial #</b> | <b>Latitude</b>       | <b>Longitude</b>      | <b>Depth (m)</b> | <b>Deployment date</b> | <b>Deployment time (local)</b> | <b>Recovery date (local)</b> | <b>Recovery time (local)</b> | <b>Deploy period (d)</b> |
|-------------------------|--------------------------|-----------------------|-----------------------|------------------|------------------------|--------------------------------|------------------------------|------------------------------|--------------------------|
| Angel Infield pipelines | 105854                   | -19.4988 <sup>#</sup> | 116.5980 <sup>#</sup> | ≅80              | 13/09/2017             | 7:30:39                        | 24/09/2017                   | 16:11:00                     | 12                       |
| Vincent pipelines       | 105854                   | -21.4339 <sup>#</sup> | 114.0669 <sup>#</sup> | ≅120             | 15/10/2017             | 7:50:39                        | 25/10/2017                   | 17:18:00                     | 14                       |
| North Rankin B          | 105854                   | -19.5856              | 116.1367              | 124              | 6/05/2018              | 12:55:00                       | 27/05/2018                   | 16:15:00                     | 21                       |
| Pluto A                 | 105854                   | -19.9961              | 115.3681              | 82               | 16/06/2018             | 7:32:00                        | 10/07/2018                   | 8:15:00                      | 24                       |
| Goodwyn Alpha           | 101787                   | -19.6533              | 115.9283              | 130              | 12/08/2019             | 23:00:00                       | 3/10/2019                    | 12:58:00                     | 52                       |
| North Rankin A          | 101787                   | -19.5838              | 116.1364              | 122              | 22/10/2018             | 16:02:00                       | 10/01/2019                   | 16:31:00                     | 90                       |
